# Supplementary material for: Cytomorphological characteristics of cervical scrape from diabetes mellitus patients attending tertiary healthcare, Kenya
Source: Research Square preprint supplement (doi:10.21203/rs.3.rs-5976587/v1), 2025-04-16
Supplement: Supplementary file 1 [file 7096b1ea34613905fce38d51.docx]

**APPENDIX 2:** **DATA COLLECTION SHEET**

**ALL** consenting study participants will be required to fill out the questionnaire before proceeding with sample collection. Please **TICK** one of the choices given and/or comment where applicable.

**Study Participant Identifier: _______________________**

1. **Socio-demographics data:**
2. Age: __________
3. Education level: Primary [ ] Secondary [ ] Tertiary [ ]
4. Occupation: Formal [ ] Informal [ ] None [ ]
5. Marital status: Single [ ] Married [ ] Divorced [ ] Widowed [ ]
6. Monogamy [ ] Polygamy [ ] NA [ ]
7. Alcohol Consumption: Y [ ] N [ ]
8. Cigarette or Tobacco use: Y [ ] N [ ]
9. Residence Urban [ ] Suburban [ ] Rural [ ]

1. **Clinical Covariates**
2. Have you ever received health education on Cervical cancer Y [ ] N [ ]
3. Do you know any cervical cancer signs/symptoms Y [ ] N [ ]
4. How would you rate you knowledge about Cervical cancer signs Low [ ] Medium [ ] High [ ]
5. Have you ever been screened for cervical cancer: Y [ ] N [ ]
6. If **YES**, How many times: [ ] NA [ ]
7. VIA [ ] PAP Smear [ ]
8. Your Pap/VIA results: Normal [ ] Abnormal [ ] NA [ ]
9. If **NO,** Please provide any reasons: ____________________________
10. Have you ever heard about Human Papilloma Virus/HPV Y [ ] N [ ]
11. Have you been vaccinated against Human papillomavirus (HPV)? Y [ ] N [ ]
12. Have you ever had an HPV test? Y [ ] N [ ]
13. Are you on any contraception? Y [ ] N [ ]
14. If **YES**, choose method: Natural [ ] Condom [ ] Injection [ ] IUCD [ ] Pills [ ]
15. Number of children? _______ No. Live Birth [ ] No. of stillbirth [ ]
16. Type 1 Diabetes [ ] or Type 2 Diabetes [ ]
17. Duration of diabetes in years: [ ]
18. Any diabetes complication(s)________________________________________
19. Diabetes drug regimen: ______________________________
20. Family history of Cervical Cancer: Y [ ] N [ ] Other Cancers[ ]
21. Family history of Diabetes: Y [ ] N [ ]
22. Other underlying conditions: __________________________
23. Are you on Menopause [ ] Pre-menopause [ ] Reproductive [ ]
24. Do you experience any of the following symptoms:

- Blood spots or light bleeding between or following periods [ ]
- Menstrual bleeding that is longer and heavier than usual [ ]
- Bleeding after intercourse/Post coital bleeding [ ]
- Increased vaginal discharge [ ]
- Pain during sexual intercourse [ ]
- Bleeding after menopause [ ]
- Unexplained, persistent pelvic and/or back pain [ ]

1. Last Menstrual period (LMP): ____________________
2. **Clinical Examination**

**Appearance of cervix:** Normal [ ] Eroded [ ] Inflamed [ ] Suspicious [ ]

1. **Laboratory Results Reporting Template**

**Glycemic levels reporting**

**RBS: 1……… or HbA1c……….**

**Bethesda System for Reporting Cervical Cytology reporting template**

**Specimen Adequacy:**

□ Satisfactory for Evaluation; Endocervical/Transformation Zone Component Absent; Obscuring Elements: Hemorrhage, Inflammatory Exudate, Air-Drying, Thick Smear, Crushing Artefacts involving 50 -75% of Epithelial Cells

□Unsatisfactory: Insufficient Squamous Cell Component, Thick Smear, Obscuring Artefacts- Haemorrhage, Inflammatory Exudate, Air-Drying Crushing involving>75% of Epithelial Cells

**Interpretation:**

□Non-Neoplastic Cellular Findings:

□ Squamous Metaplasia, Keratotic Changes, Tubal Metaplasia, Atrophy, Pregnancy-Related Changes

□Reactive Cellular Changes Associated with Inflammation (Includes Repair) / Radiation / Intrauterine Contraceptive Device

□ Organisms: Trichomonas vaginalis/Fungal Organisms Morphologically Consistent with Candida spp./Shift in Flora Suggestive of Bacterial Vaginosis/ Bacterial Organisms Morphologically Consistent with Actinomyces spp./Cellular Changes Associated with Herpes Simplex Virus / Cellular Changes Associated with Cytomegalovirus

□Glandular Cells Post-Hysterectomy

□ Endometrial Cells Present in Women over 45 Years of Age

□Squamous/Glandular Epithelial Cell Abnormality

□ Malignancy

**Category:**

Unsatisfactory

□ Negative for Intraepithelial Lesion or Malignancy

□ Negative for Intraepithelial Lesion or Malignancy with Benign Endometrial Cells in Women over 45 Years of Age

Atypical Squamous Cells of Undetermined Significance (ASC-US)

□Atypical Squamous Cells of Undetermined Significance-Cannot Exclude HSIL (ASCH)

□Low-Grade Squamous Intraepithelial Lesion (LSIL)

□ High-Grade Squamous Intraepithelial Lesion (HSIL)

□Atypical Glandular Cells (AGC)- Not Specified (NOS)/Favour Neoplastic (FN)

□Atypical Endocervical/Endometrial Cells-Not Specified (NOS)/ Favour Neoplastic (FN)

□Positive for Malignancy: Squamous Cell Carcinoma (SqCC), Endocervical Adenocarcinoma in Situ (AIS), Adenocarcinoma [Endocervical, Endometrial, Extrauterine, Not Otherwise Specified (NOS)]

**Recommendation:**

□ Unsatisfactory-Repeat Pap smear after 2-4 months

□NILM-Follow up with annual/routine Pap smear

□NILM with absent endocervical/transformation zone component - HPV testing (preferred) or follow up with routine Pap smear

□ NILM with endometrial cells present in women over 45 years of age - Endometrial sampling in postmenopausal women / no endometrial sampling in a woman having menses

□ASC-US-HPV testing / repeat Pap smear after 1 year if patient < 20 years of age

□AGC-NOS/FN/atypical endocervical cells- Colposcopy (with endocervical sampling if not pregnant) and endometrial sampling only if women ≥35 years of age or <35 years of age and at risk for endometrial neoplasia (abnormal uterine bleeding, obesity or conditions suggesting chronic anovulation)

Atypical Endometrial Cells - Endometrial and endocervical sampling. Colposcopy may also be performed.

□ASC-H/LSIL/HSIL - Colposcopy and cervical biopsy

□ SQCC/AIS-Colposcopy and ectocervical biopsy, endocervical curettage

**Comments:**

□The presence of Actinomyces in the cervix and vagina is almost always associated with a foreign body, most commonly an intrauterine device. Removal of the intra-uterine device is not necessary, and treatment of asymptomatic women is not recommended.

□The morphological features are consistent with atrophic vaginitis

□An invasive neoplasm cannot be excluded

**Reported/Reviewed By: ………………….. Signature: ……………… Date: ...………**
